# Supplementary material for: Light-assisted gadofullerene nanoparticles disrupt tumor vasculatures for potent melanoma treatment
Source: Royal Society of Chemistry journal article supplement (doi:10.1039/c9tb02752a), 2020-01-01
Supplement: c9tb02752a1.pdf [file c9tb02752a1.pdf]

## Supporting Information

### Light-assisted Gadofullerene Nanoparticles Disrupt the Tumor Vasculatures for Potent Melanoma Treatment

Zhigao Lu,<sup>†a,b</sup> Wang Jia,<sup>†a,b</sup> Ruijun Deng,<sup>a,b</sup> Yue Zhou,<sup>a,b</sup> Xue Li,<sup>a,b</sup> Tong Yu,<sup>a,b</sup> Mingming Zhen<sup>\*a,b</sup> and Chunru Wang<sup>\*a,b</sup>

<sup>a</sup>Beijing National Laboratory for Molecular Sciences, Laboratory of Molecular Nanostructure and Nanotechnology, Institute of Chemistry, Chinese Academy of Sciences, Beijing 100190, China.

<sup>b</sup>University of Chinese Academy of Sciences, Beijing 100049, China.

<sup>†</sup>The two authors have equal contributions.

\*E-mail: zhenmm@iccas.ac.cn, crwang@iccas.ac.cn, Tel: 86-10-62652120.

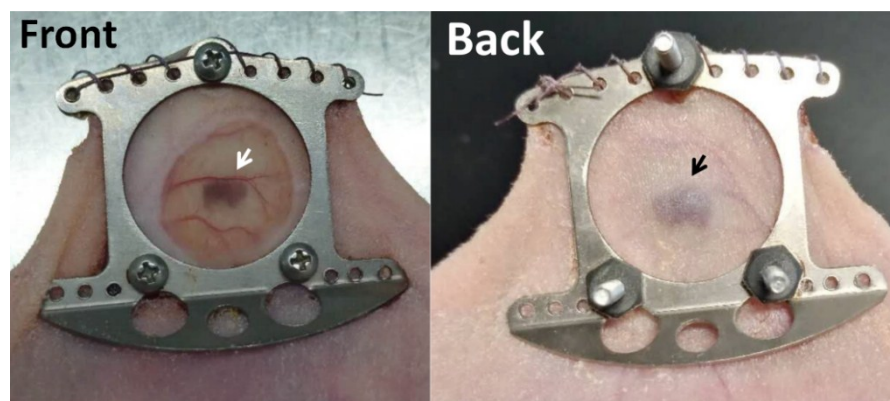

**Fig. S1** Front and back of DSFC model incubated with B16.

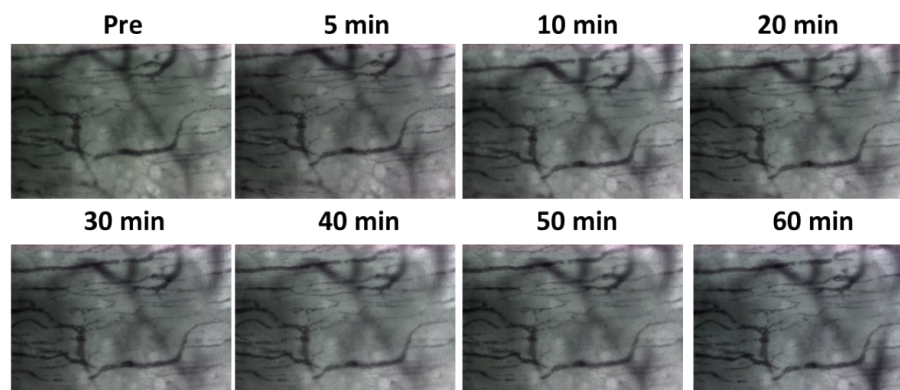

**Fig. S2** Morphological observations of the tumor vascular disruption of Ce6 in DSFC model.

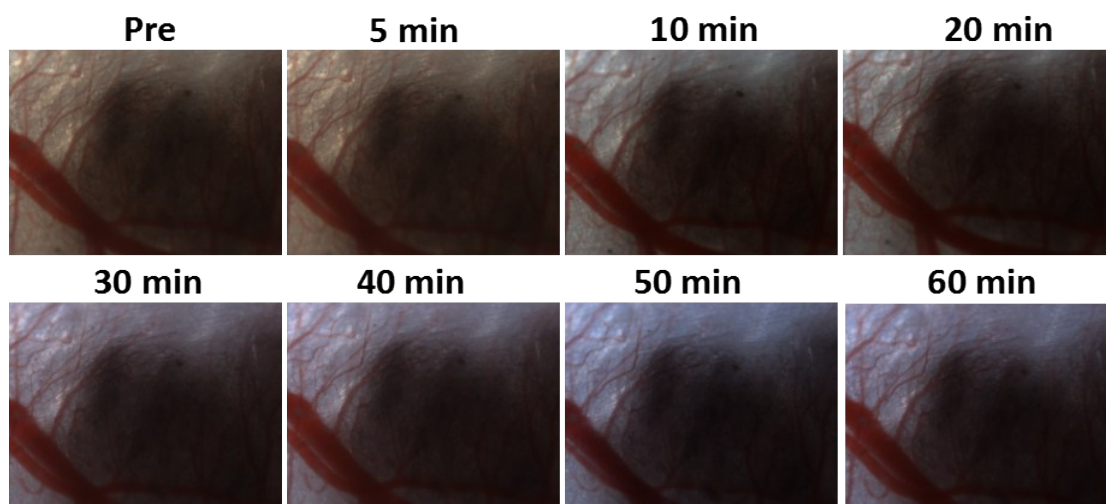

**Fig. S3** Morphological and functional observation of the tumor vascular only irradiated with white light.
